# Supplementary material
Source: PubMed Central journal article supplement (PMC3868356)
Supplement: Supp_Data.pdf [file Supp_Data.pdf]

**SUPPLEMENTARY MATERIAL  
QUIZZES FOR "POMPEII"**

Initials \_\_\_\_\_

Quiz 1.

1. What is Marcus Attilius Primus's job?
  - a. Farmer
  - b. Engineer
  - c. Travel guide
  
2. What caused the death of Ampliatus's expensive fish?
  - a. Other fish
  - b. His slave
  - c. Sulfur
  
3. What did Ampliatus do after the death of fish?
  - a. Fed his slave to eels
  - b. Bought new fish
  - c. Fed his slave to the sharks
  
4. On a scale from 1-4 how excited did the author's description of the death scene make feel?

|             |                |         |              |
|-------------|----------------|---------|--------------|
| Not Excited | Little Excited | Excited | Very Excited |
| 1           | 2              | 3       | 4            |

5. On a scale from 1-4 how sad did the author's description of the death scene make you feel?

|                |            |     |          |
|----------------|------------|-----|----------|
| Not Sad at All | Little Sad | Sad | Very Sad |
| 1              | 2          | 3   | 4        |

**SUPPLEMENTARY MATERIAL  
QUIZZES FOR "POMPEII"**

Initials \_\_\_\_\_

Quiz 2

1. Where did Attilus and Corax go in the boat to check on the problems with the Augusta?
  - a.) Out to Sea
  - b.) In the Lake
  - c.) The reservoir

2. What did they find there?
  - a.) That the Augusta was running dry
  - b.) A bunch of dead fish
  - c.) That there was nothing wrong

3. Where was Attilus trying to get the Admiral to take him on the ship?
  - a.) Rome
  - b.) Pompeii
  - c.) Neapolis

4. On a scale from 1-4 how arousing was today's reading?

|             |        |         |              |
|-------------|--------|---------|--------------|
| 1           | 2      | 3       | 4            |
| Not Aroused | Little | Aroused | Very Aroused |

5. How frustrated did you feel with the distrust that everyone had in Attilus?

|             |        |         |              |
|-------------|--------|---------|--------------|
| 1           | 2      | 3       | 4            |
| Not Aroused | Little | Aroused | Very Aroused |

**SUPPLEMENTARY MATERIAL  
QUIZZES FOR "POMPEII"**

Initials \_\_\_\_\_

Quiz 3

1. What was the incentive for Attilius's men to go to Pompeii?
  - a.) To get laid at one of the brothels
  - b.) To eat good food
  - c.) To work very hard
  
2. Where is Ampliatus the former slave made rich originally from?
  - a.) Rome
  - b.) No one knows
  - c.) Pompeii
  
3. What happened at the end of the reading that startled Attilius?
  - a.) more fish were dying
  - b.) the elections that were taking place
  - c.) the ground shaking/earthquake in Pompeii
  
4. On a scale from 1-4 how arousing was today's reading?

|             |        |         |              |
|-------------|--------|---------|--------------|
| 1           | 2      | 3       | 4            |
| Not Aroused | Little | Aroused | Very Aroused |

**SUPPLEMENTARY MATERIAL  
QUIZZES FOR "POMPEII"**

Initials \_\_\_\_\_

Quiz 4

1. At the beginning of the reading whom did Attilius deliver a message to from the emperor?
  - a.) Corax
  - b.) The four elected magistrates
  - c.) The Admiral
  
2. How did the recipients of the letter react to the letter's content?
  - a.) obliged Attilius immediately
  - b.) stated that they have water..... and told them to "fuck off out of here"
  - c.) had to ponder over the situation for some time
  
3. What was the final event that freed Ampliatus from slavery?
  - a.) earthquake in Pompeii
  - b.) volcano eruption
  - c.) his master just freed him one day unexpectedly
  
4. At the end of the reading where was Attilius going?
  - a.) Pompeii Gate
  - b.) Roman Gate
  - c.) Vesuvius Gate
  
5. On a scale from 1-4 overall how aroused were you from this reading? Please include the arousal from the sexual explicit parts of today's reading.

|             |        |         |              |
|-------------|--------|---------|--------------|
| 1           | 2      | 3       | 4            |
| Not Aroused | Little | Aroused | Very Aroused |

**SUPPLEMENTARY MATERIAL  
QUIZZES FOR "POMPEII"**

Initials \_\_\_\_\_

Quiz 5

1. What did Attilius eat at Ampliatus's banquet that made him nauseous?  
d.) chicken  
e.) mice  
f.) snakes
  
2. Who is Attilius's love interest?  
d.) Corax  
e.) Brittius  
f.) Corelia
  
3. Where did Corelia go at the end of today's reading?  
d.) she went to her future husband's bedroom  
e.) to Pompeii  
f.) out of Pompeii on the road to Vesuvius

4. On a scale from 1-4 how arousing was today's reading?

|             |        |         |              |
|-------------|--------|---------|--------------|
| 1           | 2      | 3       | 4            |
| Not Aroused | Little | Aroused | Very Aroused |

5. On a scale from 1-4 overall how aroused were you from the sexually explicit parts of today's reading.

|             |        |         |              |
|-------------|--------|---------|--------------|
| 1           | 2      | 3       | 4            |
| Not Aroused | Little | Aroused | Very Aroused |

**SUPPLEMENTARY MATERIAL  
QUIZZES FOR "POMPEII"**

Initials \_\_\_\_\_

Quiz 6

1. What did the block in the Augusta create in only one day's time?
  - a.) a lake
  - b.) a giant hole
  - c.) a huge amount of mud
  
2. Who was missing at the beginning of the reading?
  - a.) Attilius
  - b.) Corax
  - c.) Corvinus
  
3. What did Attilius find when ventured into the aqueduct?
  - a.) water
  - b.) that there was a blockage caused by lime build up on the walls
  - c.) that it was blocked by earth that had been thrust upward by some sort of strong force
  
4. what happened to Attilius as the water began to flow again?
  - a.) he was thrown backward by the strong force of water
  - b.) he quickly was pulled from the aqueduct
  - c.) he died
  
5. On a scale from 1-4 how arousing was today's reading?

|             |        |         |              |
|-------------|--------|---------|--------------|
| 1           | 2      | 3       | 4            |
| Not Aroused | Little | Aroused | Very Aroused |

**SUPPLEMENTARY MATERIAL  
QUIZZES FOR "POMPEII"**

Initials \_\_\_\_\_

Quiz 7

1. What did Attilius and his men find when dawn broke after fixing the Aqueduct?
  - a.) snow
  - b.) ash
  - c.) water
  
2. What caused Attilius's wife's death?
  - a.) a stroke
  - b.) Childbirth
  - c.) Eels
  
3. Who did Attilius find dead at the summit of the mountain?
  - a.) Exomnius
  - b.) Corax
  - c.) Ampliatius
  
4. What happened when Attilius ran into Corax?
  - a.) Corax died
  - b.) Corax killed Attilius
  - c.) Nothing
  
5. On a scale from 1-4 how arousing was today's reading?

|             |        |         |              |
|-------------|--------|---------|--------------|
| 1           | 2      | 3       | 4            |
| Not Aroused | Little | Aroused | Very Aroused |

**SUPPLEMENTARY MATERIAL  
QUIZZES FOR "POMPEII"**

Initials \_\_\_\_\_

Quiz 8

1. What happened to Attilius when the mountain started to erupt?
  - a.) He was thrown forward on his horse and was unable to hear noise.
  - b.) The explosion killed him instantly.
  - c.) He did not even notice that the mountain was erupting.
  
2. How did the people of Pompeii react to the eruption?
  - a.) They didn't even notice.
  - b.) A few of them screamed but most were in shock and could not believe what was happening.
  - c.) They ran like fools
  
3. Who helped Corelia when the volcano erupted?
  - a.) Popidius
  - b.) No one
  - c.) Attilius

4. On a scale from 1-4 how arousing was today's reading?

|             |        |         |              |
|-------------|--------|---------|--------------|
| 1           | 2      | 3       | 4            |
| Not Aroused | Little | Aroused | Very Aroused |

5. On a scale from 1-4 overall how aroused were you from the death scenes in today's reading.

|             |        |         |              |
|-------------|--------|---------|--------------|
| 1           | 2      | 3       | 4            |
| Not Aroused | Little | Aroused | Very Aroused |



**SUPPLEMENTARY MATERIAL  
QUIZZES FOR "POMPEII"**

Initials \_\_\_\_\_

Quiz 9

1. Overall how arousing was the book?

|             |        |         |              |
|-------------|--------|---------|--------------|
| 1           | 2      | 3       | 4            |
| Not Aroused | Little | Aroused | Very Aroused |

2. On a scale from 1-4 how arousing was today's reading?

|             |        |         |              |
|-------------|--------|---------|--------------|
| 1           | 2      | 3       | 4            |
| Not Aroused | Little | Aroused | Very Aroused |

3. On a scale from 1-4 overall how aroused were you from the explicated death scene parts in today's reading?

|             |        |         |              |
|-------------|--------|---------|--------------|
| 1           | 2      | 3       | 4            |
| Not Aroused | Little | Aroused | Very Aroused |

4. How did today's reading end?

---

---

---

---

---

5. Please leave any additional comments on your thoughts about the book. How did you react to the book, i.e. did the book excite you or give you bad dreams? Please write any comments or feelings pertaining to the reading.

---

---

---

---

---

---

---

---

---

---
